# Supplementary material for: Internal tides off the Amazon shelf during two contrasted seasons: interactions with background circulation and SSH imprints
Source: Copernicus journal article supplement (doi:10.5194/os-18-1591-2022), 2022-11-21
Supplement: Supplementary file 1 [file os-18-1591-2022-supplement.zip]

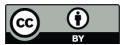

*Supplement of*

**Internal tides off the Amazon shelf during two contrasted seasons:  
interactions with background circulation and SSH imprints**

**Michel Tchilibou et al.**

*Correspondence to:* Michel Tchilibou ([michel.tchilibou@legos.obs-mip.fr](mailto:michel.tchilibou@legos.obs-mip.fr))

- [os-18-1591-2022-supplement-title-page.pdf](#)
- movie
  - [vortiflux\\_mrs\\_avl.mp4](#)
  - [vortiflux\\_sep\\_oct.mp4](#)

The copyright of individual parts of the supplement might differ from the article licence.
